# Supplementary material for: Pearl millet (Pennisetum glaucum) couscous breaks down faster than wheat couscous in the Human Gastric Simulator, though has slower starch hydrolysis
Source: Royal Society of Chemistry journal article supplement (doi:10.1039/c9fo01461f), 2019-11-22

## Electronic Supplementary Information

### **Pearl millet (*Pennisetum glaucum*) couscous breaks down faster than wheat couscous in the Human Gastric Simulator, though has slower starch hydrolysis**

Anna M.R. Hayes <sup>a</sup>, Clay Swackhamer <sup>b</sup>, Yamile Mennah-Govela <sup>b</sup>, Mario M. Martinez <sup>c</sup>, Aminata Diatta <sup>a</sup>,  
Gail M. Bornhorst <sup>b,d,\*</sup>, Bruce R. Hamaker <sup>a\*</sup>

<sup>a</sup> Whistler Center for Carbohydrate Research & Department of Food Science, Purdue University, West Lafayette, USA

<sup>b</sup> Department of Biological and Agricultural Engineering, University of California, Davis, USA

<sup>c</sup> School of Engineering, University of Guelph, Guelph, Canada

<sup>d</sup> Riddet Institute, Palmerston North, New Zealand

**Table S1.** Percent starch hydrolysis (%) of digesta withdrawn from the HGS at different time points and for different types of couscous (not expressed per unit area). All values are means of multiple runs in the HGS ( $n = 3$  runs, except for millet small which was  $n = 4$ )  $\pm$  standard deviation. Values in each column that do not share a letter (abc) represent significant differences ( $p < 0.05$ ) within a certain type of couscous across different digestion times. Values in each row that do not share a letter (zyx) represent significant differences ( $p < 0.05$ ) within a certain timepoint across different types of couscous. If no letter is shown, there were no statistically significant differences.

|                             | <b>Percent starch hydrolysis (%) in HGS</b> |                                 |                                |                                 |                                |
|-----------------------------|---------------------------------------------|---------------------------------|--------------------------------|---------------------------------|--------------------------------|
| <b>Digestion time (min)</b> | <b>Wheat small</b>                          | <b>Wheat commercial</b>         | <b>Millet small</b>            | <b>Millet large</b>             | <b>Millet commercial</b>       |
| <b>30</b>                   | 1.80 $\pm$ 0.11 <sup>d</sup>                | 1.64 $\pm$ 0.11 <sup>d</sup>    | 1.68 $\pm$ 0.01 <sup>c</sup>   | 1.75 $\pm$ 0.35 <sup>e</sup>    | 1.73 $\pm$ 0.06 <sup>d</sup>   |
| <b>60</b>                   | 2.39 $\pm$ 0.07 <sup>d</sup>                | 2.01 $\pm$ 0.34 <sup>cd</sup>   | 1.86 $\pm$ 0.22 <sup>c</sup>   | 1.87 $\pm$ 0.15 <sup>de</sup>   | 2.30 $\pm$ 0.12 <sup>d</sup>   |
| <b>90</b>                   | 3.00 $\pm$ 0.17 <sup>cd</sup>               | 3.10 $\pm$ 0.57 <sup>bc</sup>   | 2.22 $\pm$ 0.07 <sup>c</sup>   | 2.41 $\pm$ 0.25 <sup>de</sup>   | 2.78 $\pm$ 0.06 <sup>cd</sup>  |
| <b>120</b>                  | 3.94 $\pm$ 0.31 <sup>bc</sup>               | 3.62 $\pm$ 0.18 <sup>ab</sup>   | 2.69 $\pm$ 0.11 <sup>bc</sup>  | 3.01 $\pm$ 0.05 <sup>cd</sup>   | 3.74 $\pm$ 0.06 <sup>bc</sup>  |
| <b>150</b>                  | 4.44 $\pm$ 0.28 <sup>abc</sup>              | 4.55 $\pm$ 0.33 <sup>a</sup>    | 3.79 $\pm$ 0.60 <sup>ab</sup>  | 4.47 $\pm$ 0.45 <sup>ab</sup>   | 4.77 $\pm$ 0.18 <sup>ab</sup>  |
| <b>180</b>                  | 5.63 $\pm$ 0.00 <sup>ab,zy</sup>            | 4.74 $\pm$ 0.34 <sup>a,zy</sup> | 4.23 $\pm$ 0.22 <sup>a,y</sup> | 4.98 $\pm$ 1.24 <sup>a,zy</sup> | 5.75 $\pm$ 0.24 <sup>a,z</sup> |

**Figure S1.** Light micrographs (A-H) of the initial flour and couscous samples: millet flour (A), small millet couscous (B), large millet couscous (C), commercial millet couscous (D), wheat flour (E), small wheat couscous (F), large wheat couscous (G), commercial wheat couscous (H).

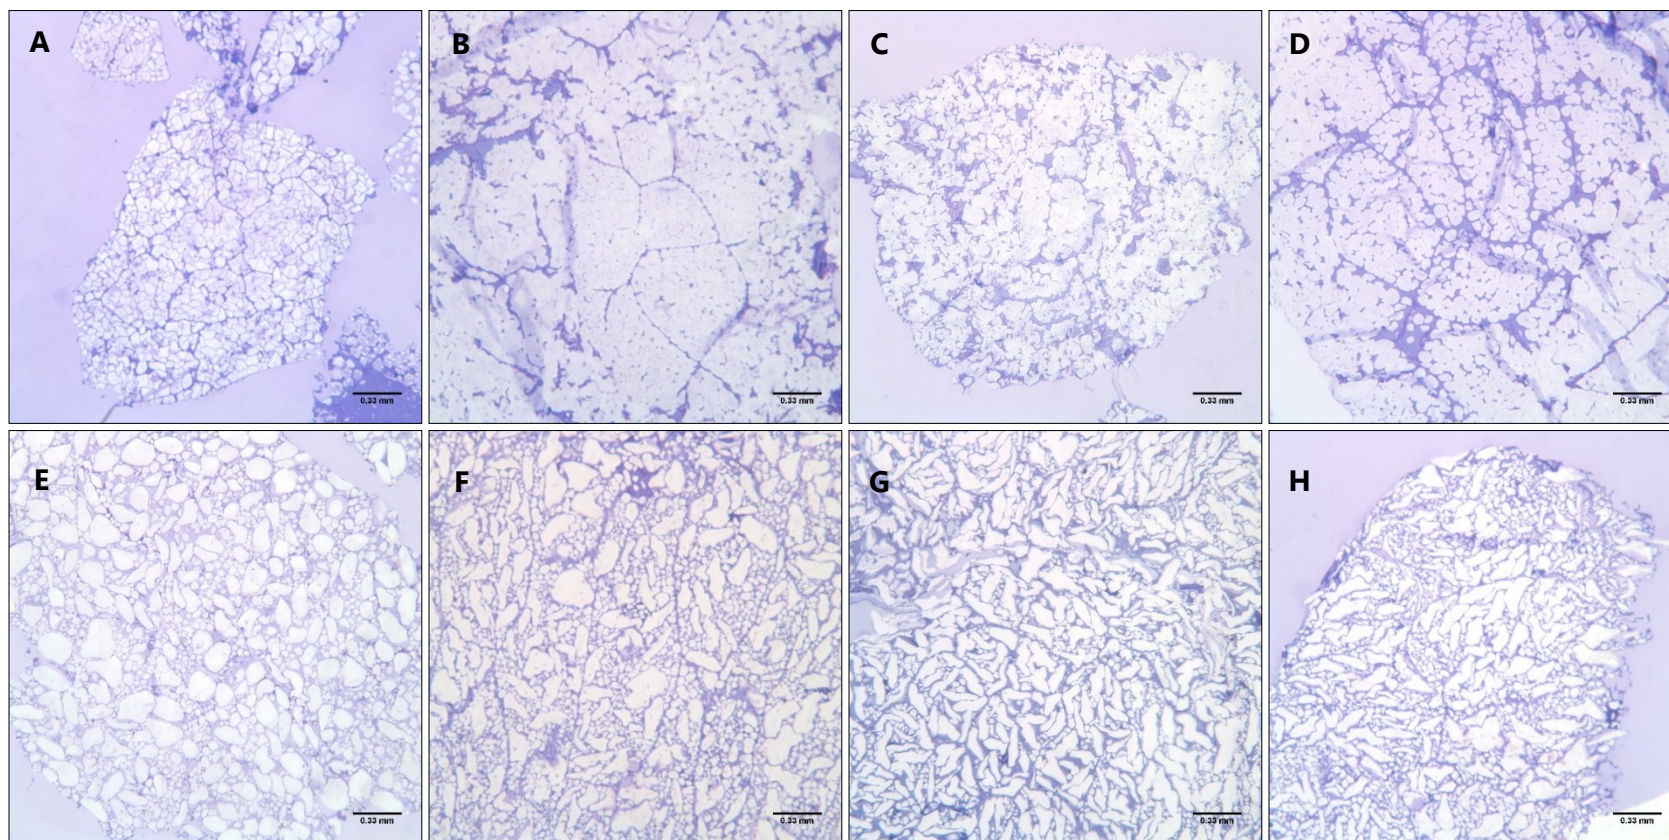

Supplement: c9fo01461f1.pdf [file c9fo01461f1.pdf]
